# Supplementary material for: Characterization of Botanical Origin of Italian Honey by Carbohydrate Composition and Volatile Organic Compounds (VOCs)
Source: MDPI journal article supplement (doi:10.3390/foods11162441), 2022-08-13
Supplement: s1 [file s1]

## Supplementary materials

# Characterization of Botanical Origin of Italian Honey by Carbohydrate Composition and Volatile Organic Compounds (VOCs)

Raffaello Tedesco <sup>1,2</sup>, Elisa Scalabrin <sup>1,3</sup>, Valeria Malagnini <sup>2</sup>, Lidija Strojnik <sup>4</sup>, Nives Ogrinc <sup>4</sup>  
and Gabriele Capodaglio <sup>1,\*</sup>

<sup>1</sup> Department of Environmental Sciences, Informatics and Statistics, University of Venice, Ca' Foscari, Via Torino 155, 30172 Venice Mestre, Italy

<sup>2</sup> Centro Ricerca e Innovazione, Fondazione Edmund Mach (FEM), Via E.Mach, 1, San Michele all'Adige, 38010 Trento, Italy

<sup>3</sup> National Research Council, Polar Science Institute, Via Torino 155, 30172 Venice Mestre, Italy

<sup>4</sup> Department of Environmental Sciences, Jožef Stefan Institute, 1000 Ljubljana, Slovenia

\* Correspondence: capoda@unive.it

## Supplementary Table

**Table S1.** Eighty volatile organic compounds identified in floral honey samples by HS-SPME-GC/MS, reporting retention time and molecular weight of each aromatic compound.

| Compound                                                 | Retention time (min) | Molecular weight |
|----------------------------------------------------------|----------------------|------------------|
| Octane                                                   | 2.1                  | 114              |
| Ethyl Acetate                                            | 2.6                  | 88               |
| Butanal, 3-methyl-                                       | 2.9                  | 86               |
| Ethanol                                                  | 3.5                  | 46               |
| 2,3-Butanedione                                          | 3.7                  | 86               |
| Pentanal, 3-methyl-                                      | 4.6                  | 100              |
| Propanal, 2-methyl-                                      | 6.8                  | 72               |
| Dodecane                                                 | 8.6                  | 170              |
| D-Limonene                                               | 8.7                  | 136              |
| $\gamma$ -Terpinene                                      | 10.4                 | 136              |
| o-Cymene                                                 | 11.4                 | 134              |
| Octanal                                                  | 12.2                 | 128              |
| 2-Nonanone                                               | 16.1                 | 142              |
| 1,3,8-p-Menthatriene                                     | 16.2                 | 134              |
| Nonanal                                                  | 16.3                 | 142              |
| Tetradecane                                              | 16.6                 | 198              |
| p-Mentha-1,5,8-triene                                    | 17.4                 | 134              |
| trans-Linalool oxide (furanoid)                          | 18.2                 | 170              |
| Acetic acid                                              | 19.1                 | 60               |
| Furfural                                                 | 19.2                 | 96               |
| Decanal                                                  | 20.5                 | 156              |
| Pentadecane                                              | 20.7                 | 212              |
| Benzaldehyde                                             | 21.3                 | 106              |
| Lilac aldehyde A                                         | 22.1                 | 168              |
| Lilac aldehyde C                                         | 22.5                 | 168              |
| Linalool                                                 | 22.7                 | 154              |
| Lilac aldehyde B                                         | 22.9                 | 168              |
| Propanoic acid, 2-methyl-                                | 23.6                 | 88               |
| Lilac aldehyde D                                         | 23.8                 | 168              |
| Terpinen-4-ol                                            | 24.5                 | 154              |
| Hexadecane                                               | 24.7                 | 226              |
| 1,5,7-Octatrien-3-ol, 3,7-dimethyl-<br>(Hotrienol)       | 25.1                 | 152              |
| Butanoic acid                                            | 25.8                 | 88               |
| Benzeneacetaldehyde                                      | 26.0                 | 120              |
| Butanoic acid, 2-methyl- and Butanoic<br>acid, 3-methyl- | 27.4                 | 102              |
| Terpineol                                                | 28.3                 | 154              |
| 2-Furanmethanol                                          | 28.6                 | 98               |
| 2,6-Dimethyl-1,3,5,7-octatetraene, E,E-                  | 30.6                 | 134              |
| 1-Nonanol                                                | 30.8                 | 144              |
| Pentanoic acid, 3-methyl-                                | 31.8                 | 116              |
| Hexanoic acid                                            | 33.7                 | 116              |
| 1-Decanol                                                | 34.8                 | 158              |
| Nonadecane                                               | 35.8                 | 268              |
| Lilac alcohol A                                          | 36.8                 | 170              |
| Creosol                                                  | 37.2                 | 138              |

**Table S1 (Continued).** Eighty volatile organic compounds identified in floral honey samples by HS-SPME-GC/MS, reporting retention time and molecular weight of each aromatic compound.

| Compound                              | Retention time (min) | Molecular weight |
|---------------------------------------|----------------------|------------------|
| Benzylalcohol                         | 37.6                 | 108              |
| Hexanoic acid, 2-ethyl-               | 38.1                 | 144              |
| Heptanoic acid                        | 38.2                 | 130              |
| 3,7-Octadiene-2,6-diol, 2,6-dimethyl- | 38.6                 | 170              |
| Phenylethylalcohol                    | 40.8                 | 122              |
| Cinnamaldehyde (E)                    | 42.0                 | 132              |
| Octanoic acid                         | 44.8                 | 144              |
| Heneicosane                           | 46.9                 | 296              |
| m-Guaiacol                            | 47.8                 | 124              |
| p-Cymene                              | 47.9                 | 134              |
| Caprolactam                           | 48.7                 | 113              |
| Eugenol                               | 48.9                 | 164              |
| 3-Phenylpropanol                      | 49.1                 | 136              |
| Nonanoic acid                         | 49.4                 | 158              |
| Thymol                                | 50.1                 | 150              |
| n-Decanoic acid                       | 52.5                 | 172              |
| Eicosane                              | 53.2                 | 282              |
| Heptadecane                           | 53.3                 | 240              |
| Octadecane                            | 53.3                 | 254              |
| Geranic acid                          | 54.1                 | 168              |
| Diethyl Phthalate                     | 54.4                 | 222              |
| Benzoic acid                          | 55.9                 | 122              |
| 2,7-Octadiene-1,6-diol, 2,6-dimethyl- | 56.2                 | 170              |
| Dodecanoic acid                       | 57.2                 | 200              |
| Benzeneacetic acid                    | 58.5                 | 136              |
| 5-Hydroxymethylfurfural               | 58.6                 | 126              |
| Dibutyl phthalate                     | 60.7                 | 278              |
| Tetradecanoic acid                    | 60.9                 | 228              |
| trans-Cinnamic acid                   | 63.7                 | 148              |
| n-Hexadecanoic acid                   | 64.6                 | 256              |

**Table S2.** Data of mean area value, standard deviation, and relative standard deviation (RSD%) of 24 identified volatile organic compounds calculated on seven replicates (n=7) of a multifloral honey.

| <b>Volatile compound</b>                        | <b>Mean</b> | <b>Std Dev</b> | <b>RSD %</b> |
|-------------------------------------------------|-------------|----------------|--------------|
| Octane                                          | 3753826     | 677092         | 18           |
| $\gamma$ -Terpinene                             | 3168509     | 114746         | 4            |
| Octanal                                         | 2392483     | 258763         | 11           |
| 2-Nonanone                                      | 2235022     | 143391         | 6            |
| Nonanal                                         | 16689855    | 1406944        | 8            |
| Acetic acid                                     | 7702118     | 344264         | 4            |
| Furfural                                        | 57421079    | 3992440        | 7            |
| Decanal                                         | 5206367     | 240636         | 5            |
| Benzaldehyde                                    | 1,91E+08    | 15223791       | 8            |
| Lilac aldehyde C                                | 2618819     | 227678         | 9            |
| Linalool                                        | 11761973    | 1201352        | 10           |
| 1,5,7-Octatrien-3-ol, 3,7-dimethyl- (hotrienol) | 1,6E+08     | 9594495        | 6            |
| Benzeneacetaldehyde                             | 24809299    | 763505         | 3            |
| Terpineol                                       | 9029434     | 698375         | 8            |
| Heptanoic acid                                  | 7228056     | 598734         | 8            |
| Phenylethyl alcohol                             | 19807629    | 846223         | 4            |
| Octanoic acid                                   | 49753568    | 2011451        | 4            |
| Nonanoic acid                                   | 60961622    | 5071476        | 8            |
| Thymol                                          | 35527182    | 1191042        | 3            |
| n-Decanoic acid                                 | 20925199    | 757184         | 4            |
| Geranic acid                                    | 11508485    | 343189         | 3            |
| Benzoic acid                                    | 37680359    | 1778475        | 5            |
| Dodecanoic acid                                 | 8296098     | 918573         | 11           |
| Tetradecanoic acid                              | 2778336     | 441329         | 16           |

**Table S3.** Melissopalynological analysis of the floral honey samples; principal (>45%) and/or accompanying pollen (15-45%), and important minor pollen types (3-15%).

| Sample | Floral type | Family           | Principal pollen (>45%)<br>and/or accompanying<br>important pollen (15-45%) | Important minor pollen (3-15%)     |
|--------|-------------|------------------|-----------------------------------------------------------------------------|------------------------------------|
| M36    | Multifloral | Ericaceae        | 42.50%                                                                      |                                    |
|        |             | Salicaceae       | <i>Salix</i> (38.0%)                                                        |                                    |
|        |             | Hippocastanaceae |                                                                             | <i>Aesculus</i> (5.7%)             |
|        |             | Rosaceae         |                                                                             | <i>Malus/Pyrus</i> (3.8%)          |
|        |             | Asteraceae       |                                                                             | <i>T-Form</i> (3.5%)               |
| M37    |             | Ericaceae        | 36.50%                                                                      |                                    |
|        |             | Fabaceae         |                                                                             | <i>Trifolium repens</i> (12.8%)    |
|        |             | Asteraceae       |                                                                             | <i>T-Form</i> (9.1%)               |
|        |             | Rosaceae         |                                                                             | <i>Rubus</i> (6.8%)                |
|        |             | Apiaceae         |                                                                             | 5.70%                              |
|        |             | Rosaceae         |                                                                             | 4.30%                              |
|        |             | Ranunculaceae    |                                                                             | <i>Clematis</i> (3.1%)             |
| M38    |             | Ericaceae        | 32.60%                                                                      |                                    |
|        |             | Rosaceae         | <i>Rubus</i> (16.0%)                                                        |                                    |
|        |             | Asteraceae       |                                                                             | <i>A-Form</i> (9.6%)               |
|        |             |                  |                                                                             | <i>T-Form</i> (3.2%)               |
|        |             | Buddlejaceae     |                                                                             | <i>Buddleja</i> (8.1%)             |
|        |             | Fabaceae         |                                                                             | <i>Trifolium pretense</i> (4.2%)   |
|        |             |                  |                                                                             | <i>Trifolium repens</i> (3.7%)     |
|        |             | Lauraceae        |                                                                             | 3.20%                              |
| M39    |             | Rosaceae         |                                                                             | <i>Malus/Pyrus</i> (3.0%)          |
|        |             | Ericaceae        | 62.80%                                                                      |                                    |
|        |             | Fagaceae         |                                                                             | <i>Castanea sativa</i> (12.1%)     |
|        |             | Apiaceae         |                                                                             | <i>A/H-Form</i> (4.0%)             |
|        |             | Ranunculaceae    |                                                                             | <i>Clematis</i> (3.5%)             |
|        |             | Boraginaceae     |                                                                             | <i>Echium</i> (3.3%)               |
|        |             | Fabaceae         |                                                                             | <i>Trifolium repens</i> (3.3%)     |
| M41    |             | Ericaceae        | 55.60%                                                                      |                                    |
|        |             | Apiaceae         |                                                                             | <i>A/H-Form</i> (8.8%)             |
|        |             | Asteraceae       |                                                                             | <i>T-Form</i> (3.8%)               |
|        |             | Rosaceae         |                                                                             | <i>Rubus</i> (3.8%)                |
|        |             | Salicaceae       |                                                                             | <i>Salix</i> (3.2%)                |
|        |             | Scrophulariaceae |                                                                             | <i>Rhinanthus</i> (3.2%)           |
| M42    |             | Ericaceae        | 35.50%                                                                      |                                    |
|        |             | Apiaceae         |                                                                             | <i>A/H-Form</i> (10.9%)            |
|        |             | Rosaceae         |                                                                             | <i>Rubus</i> (8.1%)                |
|        |             |                  |                                                                             | Others (5.5%)                      |
|        |             | Fabaceae         |                                                                             | <i>Trifolium repens</i> (7.3%)     |
|        |             |                  |                                                                             | <i>Lotus</i> (4.5%)                |
|        |             | Polygonaceae     |                                                                             | <i>Fagopyrum esculentum</i> (3.3%) |
|        |             | Scrophulariaceae |                                                                             | <i>Rhinanthus</i> (3.1%)           |

**Table S3 (continued).** Melissopalynological analysis of the floral honey samples; principal (>45%) and/or accompanying pollen (15-45%), and important minor pollen types (3-15%).

|        |                  |                                  |                                   |
|--------|------------------|----------------------------------|-----------------------------------|
| M44    | Fagaceae         | <i>Castanea sativa</i> (81.1%)   |                                   |
|        | Salicaceae       |                                  | <i>Salix</i> (10.2%)              |
|        | Rosaceae         |                                  | <i>Malus/Pyrus</i> (3.0%)         |
| M3-18  | Ericaceae        | 70.90%                           |                                   |
|        | Rubiaceae        |                                  | 8.70%                             |
|        | Fabaceae         |                                  | <i>Trifolium repens</i> (4.8%)    |
| M5-18  | Fagaceae         | <i>Castanea sativa</i> (81.1%)   |                                   |
|        | Vitaceae         |                                  | <i>Parthenocissus</i> (3.0%)      |
| M6-18  | Fagaceae         | <i>Castanea sativa</i> (81.1%)   |                                   |
|        | Asteraceae       |                                  | <i>A-Form</i> (4.1%)              |
| M7-18  | Fagaceae         | <i>Castanea sativa</i> (78.4%)   |                                   |
|        | Ericaceae        |                                  | 14.10%                            |
|        | Tiliaceae        |                                  | <i>Tilia</i> (3.1%)               |
| M9-18  | Fagaceae         | <i>Castanea sativa</i> (75.6%)   |                                   |
|        | Tiliaceae        |                                  | <i>Tilia</i> (3.1%)               |
| M16-18 | Ericaceae        | 55.50%                           |                                   |
|        | Rosaceae         |                                  | <i>Rubus</i> (5.7%)               |
|        |                  |                                  | <i>Fragaria-Potentilla</i> (4.8%) |
|        | Tiliaceae        |                                  | <i>Tilia</i> (4.4%)               |
|        | Ranunculaceae    |                                  | <i>Clematis</i> (3.5%)            |
|        | Scrophulariaceae |                                  | <i>Rhinanthus</i> (3.5%)          |
| M19-18 | Ericaceae        | 25.30%                           |                                   |
|        | Rosaceae         |                                  | <i>Rubus</i> (13.6%)              |
|        |                  |                                  | <i>Malus/Pyrus</i> (5.1%)         |
|        | Fabaceae         |                                  | <i>Onobrychis</i> (9.6%)          |
|        | Salicaceae       |                                  | <i>Salix</i> (9.6%)               |
|        | Ranunculaceae    |                                  | <i>Clematis</i> (7.1%)            |
| M20-18 | Ericaceae        | 80.40%                           |                                   |
|        | Rosaceae         |                                  | <i>Rubus</i> (11.1%)              |
| M21-18 | Ericaceae        | 80.10%                           |                                   |
|        | Rosaceae         |                                  | <i>Rubus</i> (5.7%)               |
|        | Fabaceae         |                                  | <i>Tripholium repens</i> (4.1%)   |
| M23-18 | Fagaceae         | <i>Castanea sativa</i> (73.7%)   |                                   |
|        | Tiliaceae        | <i>Tilia</i> (16.5%)             |                                   |
|        | Rosaceae         |                                  | <i>Rubus</i> (3.4%)               |
| M46 C  | Fagaceae         | <i>Castanea sativa</i> (19.9%)   |                                   |
|        | Fabaceae         | <i>Tripholium repens</i> (19.2%) |                                   |
|        |                  | <i>Robinia</i> (3.5%)            |                                   |
|        | Scrophulariaceae | <i>Verbascum</i> (18.5%)         |                                   |
|        | Rosaceae         |                                  | <i>Rubus</i> (11.1%)              |
|        |                  |                                  | Others (4.5%)                     |
|        | Ranunculaceae    |                                  | <i>Clematis</i> (4.2%)            |
|        | Rubiaceae        |                                  | 3.80%                             |

**Table S3 (continued).** Melissopalynological analysis of the floral honey samples; principal (>45%) and/or accompanying pollen (15-45%), and important minor pollen types (3-15%).

|       |                  |                                  |                                  |
|-------|------------------|----------------------------------|----------------------------------|
| M46 P | Fagaceae         | <i>Castanea sativa</i> (19.3%)   |                                  |
|       | Scrophulariaceae | <i>Verbascum</i> (17.9%)         |                                  |
|       |                  |                                  | <i>Rhinanthus</i> (6.1%)         |
|       | Fabaceae         | <i>Tripholium Repens</i> (15.2%) |                                  |
|       |                  | <i>Robinia</i> (3.4%)            |                                  |
|       | Rosaceae         |                                  | <i>Rubus</i> (10.8%)             |
| M46 D |                  |                                  | Others (4.4%)                    |
|       | Caesalpiniaceae  |                                  | <i>Gleditsia</i> (4.1%)          |
|       | Rubiaceae        |                                  | 3.70%                            |
|       | Rosaceae         | <i>Rubus</i> (21.3%)             |                                  |
|       | Fagaceae         | <i>Castanea sativa</i> (18.4%)   | <i>Malus/Pyrus</i> (3.7%)        |
|       | Scrophulariaceae |                                  | <i>Rhinanthus</i> (12.5%)        |
| M47C  | Fabaceae         |                                  | <i>Tripholium Repens</i> (11.4%) |
|       |                  |                                  | <i>Robinia</i> (4.4%)            |
|       | Ranunculaceae    |                                  | <i>Clematis</i> (8.1%)           |
|       | Cornaceae        |                                  | <i>Cornus</i> (4.0%)             |
|       | Rubiaceae        |                                  | 3.70%                            |
|       | Salicaceae       |                                  | <i>Salix</i> (3.3%)              |
| M47P  | Fagaceae         | <i>Castanea sativa</i> (41.2%)   |                                  |
|       | Rosaceae         |                                  | <i>Malus/Pyrus</i> (11.1%)       |
|       |                  |                                  | <i>Prunus</i> (4.6%)             |
|       |                  |                                  | Others (3.8%)                    |
|       | Salicaceae       |                                  | <i>Salix</i> (6.8%)              |
|       | Fabaceae         |                                  | <i>Robinia</i> (5.7%)            |
| M47 D | Cruciferae       |                                  | 4.30%                            |
|       | Rubiaceae        |                                  | 4.10%                            |
|       | Asteraceae       |                                  | <i>T-Form</i> (3.3%)             |
|       | Fagaceae         | <i>Castanea sativa</i> (41.3%)   |                                  |
|       | Rosaceae         |                                  | <i>Prunus</i> (8.6%)             |
|       |                  |                                  | <i>Malus/Pyrus</i> (7.6%)        |
| M47 P |                  |                                  | <i>Rubus</i> (6.3%)              |
|       | Rhamnaceae       |                                  | 5.80%                            |
|       | Rubiaceae        |                                  | 4.60%                            |
|       | Cruciferae       |                                  | 3.50%                            |
|       | Asteraceae       |                                  | <i>T-Form</i> (3.3%)             |
| M47 D | Fagaceae         | <i>Castanea sativa</i> (50.4%)   |                                  |
|       | Rhamnaceae       |                                  | 6.60%                            |
|       | Rosaceae         |                                  | <i>Malus/Pyrus</i> (6.9%)        |
|       |                  |                                  | <i>Rubus</i> (6.4%)              |
|       |                  |                                  | <i>Prunus</i> (5.6%)             |
|       | Rubiaceae        |                                  | 3.70%                            |
|       | Fabaceae         |                                  | <i>Robinia</i> (3.4%)            |

**Table S3 (continued).** Melissopalynological analysis of the floral honey samples; principal (>45%) and/or accompanying pollen (15-45%), and important minor pollen types (3-15%).

|         |                     |                                                                                      |                                                                                                                                                                                |                                                                                                                                                                                                                |
|---------|---------------------|--------------------------------------------------------------------------------------|--------------------------------------------------------------------------------------------------------------------------------------------------------------------------------|----------------------------------------------------------------------------------------------------------------------------------------------------------------------------------------------------------------|
|         |                     | Rosaceae                                                                             | <i>Rubus</i> (16.6%)<br>Others (10.3%)                                                                                                                                         |                                                                                                                                                                                                                |
|         |                     |                                                                                      |                                                                                                                                                                                | <i>Prunus-Gr</i> (3.3%)<br><i>Malus/Pyrus</i> (5.5%)<br><i>Robinia</i> (14%)<br><i>Camerops</i> (11.1%)<br><i>Ailanthus</i> (11.1%)<br><i>Aesculus</i> (5.5%)<br><i>A-H Form</i> (3.7%)<br><i>Salix</i> (3.7%) |
| M22-18  |                     | Fabaceae<br>Arecaceae<br>Simaroubaceae<br>Hippocastanaceae<br>Apiaceae<br>Salicaceae |                                                                                                                                                                                |                                                                                                                                                                                                                |
| A1-18   | Acacia              | Fagaceae<br>Fabaceae<br>Rosaceae                                                     | <i>Castanea sativa</i> (46.3%)<br><i>Robinia</i> (22.4%)<br><i>Rubus</i> (16.1%)                                                                                               |                                                                                                                                                                                                                |
| A11-18  |                     | Fagaceae<br>Fabaceae<br><br>Rosaceae<br>Scrophulariaceae<br>Rhamnaceae               | <i>Castanea sativa</i> (46.6%)<br><i>Robinia</i> (17.2%)<br><br><i>Tripholium Repens</i> (3.4%)<br><i>Rubus</i> (7.8%)<br><i>Rhinanthus</i> (5.0%)<br>3.80%                    |                                                                                                                                                                                                                |
| A28-18  |                     | Fabaceae<br>Rosaceae<br><br>Fagaceae<br>Ebenaceae                                    | <i>Robinia</i> (19.8%)<br><i>Rubus</i> (19.4%)<br><i>Malus/Pyrus</i> (19.0%)<br><i>Castanea sativa</i> (14.1%)<br><i>Diospyros</i> (4.6%)                                      |                                                                                                                                                                                                                |
| AD43    | Apple-<br>Dandelion | Fagaceae<br>Asteraceae<br>Salicaceae<br>Rosaceae                                     | <i>Castanea sativa</i> (32.2%)<br><i>T-Form</i> (23%)<br><i>Salix</i> (19.7%)<br><i>Malus/Pyrus</i> (18.1%)                                                                    |                                                                                                                                                                                                                |
| AD45    |                     | Fagaceae<br>Asteraceae<br>Rosaceae<br>Hydrophyllaceae<br>Simaroubaceae<br>Vitaceae   | <i>Castanea sativa</i> (49.5%)<br><br><i>T-Form</i> (14.0%)<br><i>Malus/Pyrus</i> (12.1%)<br><i>Phacelia</i> (3.8%)<br><i>Ailanthus</i> (3.3%)<br><i>Parthenocissus</i> (3.0%) |                                                                                                                                                                                                                |
| AD25-18 |                     | Rosaceae<br><br>Vitaceae<br>Fabaceae<br>Arecaceae<br>Hippocastanaceae                | <i>Malus/Pyrus</i> (22.6%)<br><br><i>Rubus</i> (11.6%)<br><i>Parthenocissus</i> (12.5%)<br><i>Robinia</i> (11.9%)<br><i>Camerops</i> (9.8%)<br><i>Aesculus</i> (4.2%)          |                                                                                                                                                                                                                |
| R2-18   | Rhododendron        | Fagaceae<br>Ericaceae                                                                | <i>Castanea sativa</i> (64.2%)<br>31.30%                                                                                                                                       |                                                                                                                                                                                                                |
| R4-18   |                     | Ericaceae<br>Fagaceae                                                                | 87.10%<br><br><i>Castanea sativa</i> (6.5%)                                                                                                                                    |                                                                                                                                                                                                                |



**Table S3 (continued).** Melissopalynological analysis of the floral honey samples; principal (>45%) and/or accompanying pollen (15-45%), and important minor pollen types (3-15%).

|         |          |               |                                   |                                |
|---------|----------|---------------|-----------------------------------|--------------------------------|
| R14-18  |          | Ericaceae     | 84.60%                            |                                |
|         |          | Rosaceae      |                                   | <i>Rubus</i> (5.5%)            |
|         |          | Fagaceae      |                                   | <i>Castanea sativa</i> (4.4%)  |
| R17-18  |          | Ericaceae     | 82.60%                            |                                |
|         |          | Rosaceae      |                                   | <i>Rubus</i> (3.7%)            |
| R18-18  |          | Ericaceae     | 91.00%                            |                                |
|         |          | Campanulaceae |                                   | 3.90%                          |
| R24-18  |          | Ericaceae     | 91.10%                            |                                |
|         |          | Fagaceae      |                                   | <i>Castanea sativa</i> (7.2%)  |
| R27-18  |          | Ericaceae     | 69.60%                            |                                |
|         |          | Fagaceae      |                                   | <i>Castanea sativa</i> (23.0%) |
| HD15-18 | Honeydew |               | Honeydew elements<br>(HDE/P=3.13) |                                |
| HD26-18 |          |               | Honeydew elements<br>(HDE/P=3.57) |                                |
| HD29-18 |          |               | Honeydew elements<br>(HDE/P=7.61) |                                |
| C40     | Chestnut | Fagaceae      |                                   | <i>Castanea sativa</i> (90.0%) |
| C8-18   |          | Fagaceae      |                                   | <i>Castanea sativa</i> (98.0%) |
| C12-18  |          | Fagaceae      |                                   | <i>Castanea sativa</i> (97.8%) |
| C13-18  |          | Fagaceae      |                                   | <i>Castanea sativa</i> (91.7%) |
| C52 C   |          | Fagaceae      |                                   | <i>Castanea sativa</i> (97.0%) |
| C52 P   |          | Fagaceae      |                                   | <i>Castanea sativa</i> (96.4%) |
| C52 D   |          | Fagaceae      |                                   | <i>Castanea sativa</i> (95.1%) |

Supplementary figures

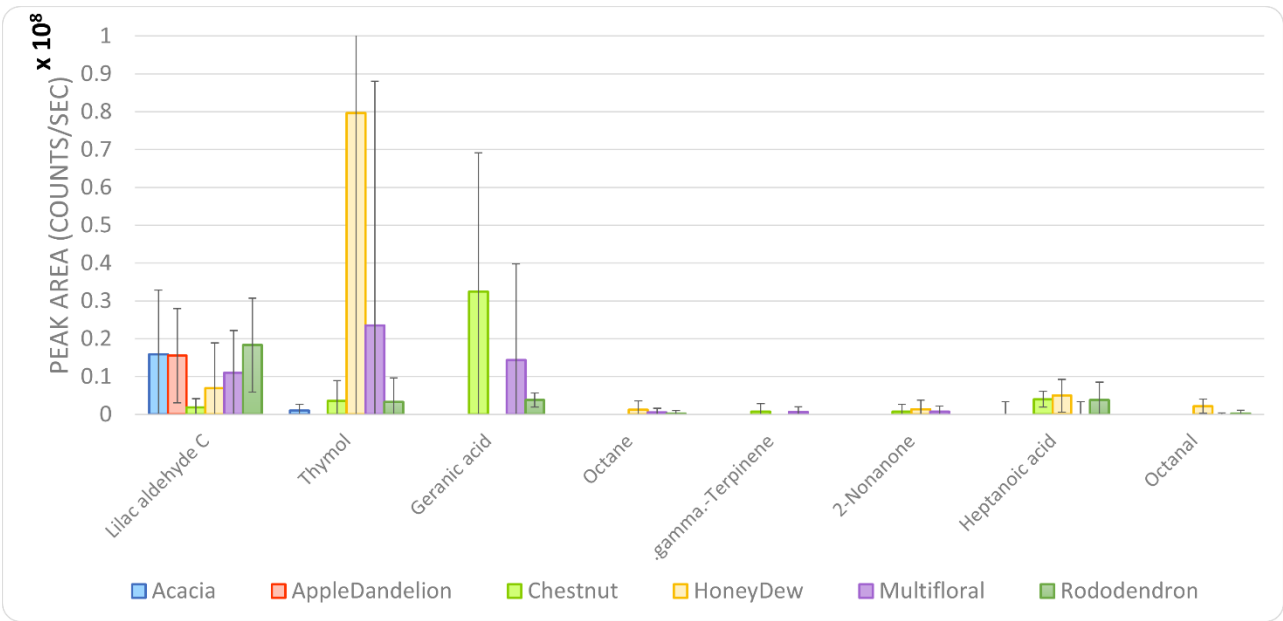

**Figure S1** Eight less intense and not statistically significant VOCs in honey samples. Error bars represents standard deviations.
